# A mathematical model for multiple COVID-19 waves applied to Kenya

Wandera Ogana<sup>1</sup>, Victor Ogesa Juma<sup>2,3</sup>, Wallace D. Bulimo<sup>4</sup>, and Vincent Nandwa Chiteri<sup>2</sup>

<sup>1</sup>African Mathematics Millennium Science Initiative, Nairobi, Kenya

<sup>2</sup>Department of Mathematics, University of Nairobi, Nairobi, Kenya.

<sup>3</sup>Mathematics Department, University of British Columbia, 1984 Mathematics Road, Vancouver, BC, V6T 1Z2, Canada.

<sup>4</sup>Centre for Virus Research and the Department of Epidemiology, Statistics and Informatics, Kenya Medical Research Institute, Nairobi, Kenya.

## Abstract

The COVID-19 pandemic, which began in December 2019, prompted governments to implement non-pharmaceutical interventions (NPIs) to curb its spread. Despite these efforts and the discovery of vaccines and treatments, the disease continued to circulate globally, evolving into multiple waves, largely driven by emerging COVID-19 variants. Mathematical models have been very useful in understanding the dynamics of the pandemic. Mainly, their focus has been limited to individual waves without easy adaptability to multiple waves. In this study, we propose a compartmental model that can accommodate multiple waves, built on three fundamental concepts. Firstly, we consider the collective impact of all factors affecting COVID-19 and express their influence on the transmission rate through piecewise exponential-cum-constant functions of time. Secondly, we introduce techniques to model the fore sections of observed waves, that change infection curves with negative gradients to those with positive gradients, hence, generating new waves. Lastly, we implement a jump mechanism in the susceptible fraction, enabling further adjustments to align the model with observed infection curve. By applying this model to the Kenyan context, we successfully replicate all COVID-19 waves from March 2020 to January 2023. The identified change points align closely with the emergence of dominant COVID-19 variants, affirming their pivotal role in driving the waves. Furthermore, this adaptable approach can be extended to investigate any new COVID-19 variant or any other periodic infectious diseases, including influenza.

**Keywords:** Mathematical model, COVID-19 pandemic, non-pharmaceutical interventions, delay functions, multiple waves

## 1 Introduction

COVID-19 is a disease caused by the novel coronavirus SARS-CoV-2 that emerged at the end of December 2019 and has since spread globally. The disease has had an adverse impact on the socioeconomic and health structures of many countries. In Kenya, the virus was first detected on 13<sup>th</sup> March 2020. Soon after, the Kenyan government implemented non-pharmaceutical interventions (NPIs) to slow the spread of the disease, including the closure of learning institutions,

NOTE: This preprint reports new research that has not been certified by peer review and should not be used to guide clinical practice.

29 limiting crowding in public transport vehicles and other places to enforce social distancing, and  
30 mask-wearing in public areas, etc. Due to low compliance by the public and a rapid rise in infec-  
31 tion, the government imposed more stringent measures for instance, banning political and social  
32 gatherings, country-wide overnight curfew, suspension of international air travel, closure of bars  
33 and clubs, and closure of places of worship, among others. The government additionally imposed  
34 COVID-19 regulations, the violation of which constituted a criminal penalty [1]. These measures  
35 remained in effect from 8<sup>th</sup> April 2020 to 8<sup>th</sup> June 2020. Enforcement of the measures adversely  
36 affected the country's economy and people's livelihoods. Consequently, the government gradually  
37 relaxed some of the mitigation measures during the period 9<sup>th</sup> June 2020 to 8<sup>th</sup> August 2020; for  
38 instance, places of worship opened with limited numbers of congregants, the lockdown was lifted  
39 in parts of Nairobi, Mombasa and Mandera, and there was resumption of international air travel.  
40 The daily infections began to go down but suddenly they started to increase in late 2020, fuelled  
41 largely by the introduction of a new variant of COVID-19 and partly by the reopening of learning  
42 institutions. The rise in infection became so concerning that a lockdown was enforced on five  
43 counties, including Nairobi and its environs, in April and May 2021. Luckily, additional mitigation  
44 measures became available following the commencement of vaccination in March 2021. The pan-  
45 demic continued to oscillate in uneven waves of varying amplitudes, as a result of the emergence  
46 and spread of new variants of concern.

47 Following the emergence of COVID-19, future waves were primarily driven by developing variants of  
48 concern [2, 3], NPIs [4, 5], vaccines and therapy [6, 7], human behaviour [8, 9], health system status  
49 [10] and host sensitivity to the virus and disease [11–14]. Some, if not all, of these factors, should  
50 be incorporated in any investigation concerning the dynamics of COVID-19 waves. As a result,  
51 COVID-19 has stimulated extensive research by collaborators from many disciplines determined to  
52 address the challenges posed by the pandemic. One such challenge involves the use of mathematical  
53 modelling to analyse, predict and simulate the dynamics of the pandemic, taking into consideration  
54 the myriad drivers of the waves. Modelling of COVID-19 is an active area of research that involves  
55 many varied approaches, as can be seen from a recent extensive review [15]. We will concentrate  
56 on compartmental models, which are the source of our current contribution. According to these  
57 models, the human population is usually divided into five compartments, namely Susceptible (S),  
58 Exposed (E), Infected (I), Recovered (R) and Dead (D) [16, 17]. By considering the rate of  
59 change of individuals in a compartment, and the contribution of appropriate compartments to this  
60 change, we obtain a system of five ordinary differential equations, including parameters that define  
61 the rate of flow between adjacent compartments. Models that use all of the compartments are  
62 named SEIRD, but those that omit the Dead compartment are called SEIR, and those that omit the  
63 Exposed compartment are labelled SIRD. If the Dead compartment is omitted, we could also end up  
64 with the classic SIR model, where R here refers to removed, namely those who have recovered or are  
65 dead. In order to incorporate the effects of various drivers of COVID-19, additional compartments  
66 may be created and appropriate interactions defined. This leads to more complicated systems with  
67 more ordinary differential equations and increased numbers of parameters, thus increasing the level  
68 of difficulty of solving the equations [18–22]. Compartmental models can also be formulated for  
69 more complex problems and the findings can serve as a guide to policymakers, as illustrated by the  
70 models for China [23], United Kingdom [5], Ukraine [24] and USA [25]. Models have also been  
71 developed that address limited issues in Kenya, for instance, [26–29].

72 The classical SEIRD model and its derivatives are designed to yield results in a single wave, since  
73 the computed infection curve is smooth and has only one peak. Observed infection curves on  
74 the other hand are not smooth as they depict many spikes and sub-epidemics. The objective of  
75 incorporating the COVID-19 drivers in compartmental models is to try and replicate the spikes and  
76 sub-epidemics, as much as possible. Some models have been modified to achieve this replication  
77 and, in addition, attempt to forecast multiple waves, as shown in the following examples. Kaxiras

78 and Neofotistos [30] used the SIR model to investigate the effects of social distancing, with a  
79 focus on identifying features that can emulate real data. They used a microscopic model in which  
80 an infected individual can only infect other individuals within a range in the neighbourhood. The  
81 model attempts to explain spikes in a wave but there is no evidence that it can forecast another  
82 wave. Perakis et. al. [31] apply the discrete version of the SEIRD model and identify a time, called  
83 the change point, that marks the end of one wave and the beginning of the next. They postulate  
84 that the recovery and infection rates have jump values at the change point. Using infection data,  
85 they apply martingales to identify the change point and hence evaluate the associated jump values  
86 of the parameters. The method describes well the spikes in one wave but it is less successful in  
87 generating another wave. The main basis of the approach by Ghosh and Ghosh [32] is that the  
88 susceptible fraction increases now and again by multiple re-infection of people who have recovered.  
89 To achieve this, they add a delay term of the infection, multiplied by a parameter regarded as  
90 the rate of re-susceptibility, to the equation involving the rate of Susceptible. The same term is  
91 subtracted from the equation involving the rate of change of the Removed. To avoid obtaining  
92 a purely periodic solution, they assign suitable values to the transmission rate, depending on the  
93 time relative to the delay constant, while holding the removal rate constant. The results provide  
94 a good match for the data from India during the selected waves. Leonov et. al. [33] use the  
95 SEI model, with the parameters assumed to be piecewise constant, rather than constant as in the  
96 classical case. They add an arbitrary function of time to the equation involving the rate of change  
97 of infection. This additional term can be considered as a source of infections associated with all  
98 other miscellaneous sources. The final solution is obtained from the inverse problem. The method  
99 replicates spikes well but it leads to large errors when the gradients of the infection are large, as  
100 would be the case involving a new wave.

101 To replicate observed infection curves, some compartmental models, as pointed out above, include  
102 various drivers of COVID-19 dynamics in additional compartments. These drivers can consist of  
103 a mitigation force, namely, a force that reduces the transmission rate of the disease, like the  
104 application of vaccines; or it can consist of a relaxation force, namely a force that increases the  
105 transmission rate of the disease, like increased crowding at a rally or stadium. Since there are so  
106 many drivers, it would be unrealistic to attempt to account for them all [31]. There exist some  
107 compartmental models, however, that consider the total mitigation and postulate that its effect on  
108 the transmission rate can be represented by a piecewise continuous function involving exponential,  
109 logistic, linear or constant functions [30, 34–37]. This concept was extended by Ogana et. al.[26]  
110 to include relaxation so that the effect of mitigation and relaxation forces on the transmission  
111 rate could result in a piecewise exponential-cum-constant function, where the exponential function  
112 decreases for mitigation, and increases for relaxation. They applied this method to the SIRD system  
113 to compute the first COVID-19 wave in Kenya. The method is simple and flexible and can easily be  
114 applied to examine different scenarios, pending more rigorous investigation on the effect of specific  
115 drivers of the pandemic.

116 The current paper uses the method in [26] together with entirely new concepts, as described  
117 hereunder. We noted that the solution of the SIRD system, in the absence of any subsequent  
118 interventions, has a computed infection curve which dissipates with time. Furthermore, a new  
119 wave is formed when the observed infection curve diverges from the dissipating computed infection  
120 curve. We chose the “change point”, namely, the boundary between successive waves, according  
121 to Perakis et. al [31], among others, as the time at which this divergence commences. We were  
122 able to establish that at a point on the computed wave, where infection decreases, it is possible  
123 to computationally generate a new wave by application of an appropriate relaxation force in the  
124 neighbourhood of the change point. The relaxation strength can be adjusted so that the fore  
125 section of the generated wave closely matches the shape of the observed infection curve. Some  
126 observed infection waves have very low infection fractions, near the change point, with curves that

127 are approximately horizontal. Furthermore, the susceptible fraction for such waves is approximately  
128 constant thus making it possible to approximate the fore section of the infection curve by an  
129 exponential function. Once the fore section of the current computed wave is generated, we choose  
130 a point on it, that also lies on, or close to, the observed infection curve. We then replace the  
131 disease variables at the chosen point on the fore section with the variables at a point in a previous  
132 wave, where the infection equals that at the chosen point on the fore section. Since the two points  
133 have the same infection value and the same direction of infection, there must be a similarity in  
134 the dynamics of the disease in the neighbourhoods of the two points. This procedure introduces  
135 a jump in the susceptible fraction and perpetuates the growth of a wave in the right direction.  
136 Mitigation or relaxation is then undertaken to yield the complete computed infection curve for the  
137 wave. Using these findings, we have computed waves that replicate the observed COVID-19 waves  
138 in Kenya to date. In addition, we determine the magnitudes of the major mitigation and relaxation  
139 forces associated with changes in the waves.

140 We present the paper according to the following outline. In Section 2.1, we describe the SIRD  
141 model. Section 2.2 contains the derivation of the equations that describe the effects of the in-  
142 tervention on the transmission rate. Section 2.3 has a review of the results for the first wave as  
143 obtained in a previous publication. In section 2.4 we present the detailed models of the second to  
144 fifth waves, starting with the generation of a wave through the application of a sufficiently large  
145 relaxation. In Section 2.5 we present the detailed models of the sixth and seventh waves, starting  
146 with the generation of a wave by assuming exponential infection. Section 3.1 contains results and  
147 a discussion of the modelled 1st wave compared with observation. Section 3.2 contains results and  
148 a discussion of the modelled 2nd to 5th waves compared with observation. Section 3.3 contains  
149 results and a discussion of the modelled 6th and 7th waves compared with observation. Finally, we  
150 give a few concluding remarks and recommendations in Section 4.

## 151 2 METHODS

152 In this section, we first present the equations for the SIRD model and then derive the equations  
153 that describe the effects of the intervention on the disease transmission rate. We present computa-  
154 tional results of the effect of applying large relaxation forces at a point where infection decreases,  
155 particularly in the neighbourhood of transition from one wave to another. The results form the  
156 basis of generating the first five waves of COVID-19 in Kenya. Finally, we derive the equations for  
157 the generation of the 6<sup>th</sup> and 7<sup>th</sup> waves.

### 158 2.1 Baseline Dynamics by SIRD Model

159 The dynamics of COVID-19 can be investigated by a variety of methods including compartmental  
160 models in which, at the time,  $t$ , the population is divided into five basic classes, namely: Susceptible,  
161 Exposed, Infected, Recovered and Dead, denoted by,  $S(t)$ ,  $E(t)$ ,  $I(t)$ ,  $R(t)$  and  $D(t)$ , respectively.  
162 Depending on the phenomena being investigated, some compartments may be excluded or new  
163 compartments may be added. In this paper, we will apply the SIRD model in which the Exposed  
164 ( $E$ ) component is omitted, as shown in Figure 1.

165 We assume that the total population,  $N$ , is constant over time. For simplicity, the variables are  
166 already normalised on division by  $N$  such that

$$S(t) + I(t) + R(t) + D(t) = 1 \quad (1)$$

167  $S(t)$ ,  $I(t)$ ,  $R(t)$  and  $D(t)$  now represent the fractions or proportions of the Susceptible, Infected,  
168 Recovered and Dead in the population, at any given time  $t$ . The governing differential equations

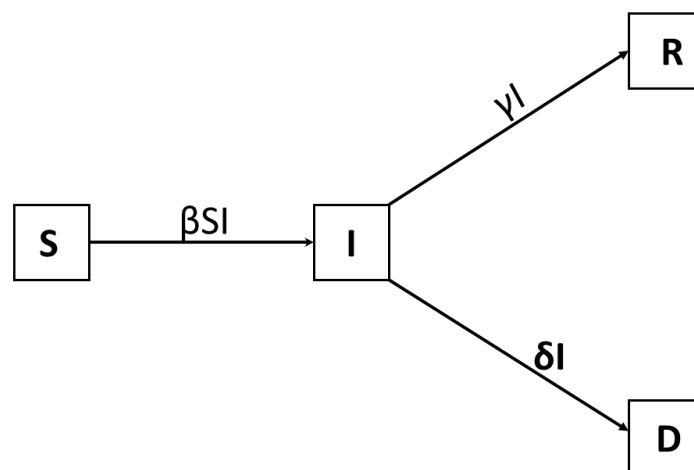

Figure 1: Compartmental SIRD model.

169 are given as follows (see for example, [16, 26]).

$$\frac{dS}{dt} = -\beta SI, \quad (2a)$$

$$\frac{dI}{dt} = \beta SI - (\gamma + \delta)I, \quad (2b)$$

$$\frac{dR}{dt} = \gamma I, \quad (2c)$$

$$\frac{dD}{dt} = \delta I, \quad (2d)$$

170 subject to the initial conditions:

$$S(0) = S_0, I(0) = I_0, R(0) = R_0, D(0) = D_0, \quad (3)$$

171 where  $S_0, I_0, R_0$  and  $D_0$ , are the initial fractions of the Susceptible, Infected, Recovered and Dead,  
172 respectively.

173 The system of equations (2) contains the parameters:  $\beta$ , the disease transmission rate;  $\gamma$ , the  
174 recovery rate; and  $\delta$ , the death rate.

175 Solution of System (2) together with initial conditions (3) involves determining the parameters  
176  $\beta, \gamma$ , and  $\delta$  that lead to the minimization of some error norm. COVID-19 was first detected in  
177 Kenya on 13<sup>th</sup> March 2020 and it spread till 8<sup>th</sup> April 2020, before any measures were undertaken  
178 to control its spread. This period serves as the reference timeframe during which the disease spread  
179 without any intervention, and hence we refer to it as the baseline period. With the death rate,  
180  $\delta = 0.015$ , approximated from the Case Fatality Rate (CFR), minimization yielded the following  
181 values for the other 2 parameters during the baseline period [26].

$$\gamma = 0.0518939, \quad \beta = 0.184618 \quad (4)$$

182 From Equation (4) we obtain the reproduction number,  $R_0 = 2.76$  and the recovery days,  $\frac{1}{\gamma} = 19.3$ .  
183 If  $\gamma$  and  $\beta$  in Equation (4) are substituted into Equation (2) one can determine the trajectory of the  
184 infected fraction, among the other variables. The model we develop in the current paper uses the  
185 values in Equation (4) and assumes that interventions affect only the transmission rate,  $\beta$ , while  
186 the recovery and the death rates remain constant.

## 187 2.2 Effect of Interventions on the Transmission Rate

188 There exist two types of forces in epidemic interventions: mitigation forces that reduce the rate  
189 and extent of infection and relaxation forces that increase the rate and extent. Although mitigation  
190 forces are generally perceived as non-pharmaceutical interventions (NPIs), arising from implemen-  
191 tation of government policy, we will include among them medical treatment and vaccination, as  
192 these actions help to reduce disease spread. Relaxation forces are generally perceived as the lifting  
193 of mitigation measures in order to limit the impact of the disease on society. We will include among  
194 them non-compliance with mitigation measures and the emergence of new variants of COVID-19,  
195 since both of these dramatically increase the spread of the disease. As noted earlier, there are mod-  
196 els that introduce more compartments in order to incorporate mitigation and relaxation forces. Our  
197 approach is to consider the totality of mitigation or relaxation forces without isolating individual  
198 components.

199 In this paper, we formulate an intervention model which leads to piecewise exponential-cum-  
200 constant functions for the transmission rate, as a result of the effects of interventions. It takes into  
201 account the fact that intervention not only leads to a reduction of the transmission rate, through  
202 mitigation, but also can lead to a surge in the transmission rate, through relaxation. Let the daily  
203 events be at the time nodes denoted  $t_0, t_1, t_2, \dots$ . Suppose any intervention (mitigation or relax-  
204 ation), is initiated at the time node  $t_k$  then there will be a difference in the transmission rate before  
205 and after  $t_k$ . Let  $\beta_b(t)$  be the incoming transmission rate at the time  $t_k$ . We assume that for any  
206 time  $t > t_k$ , the rate of change of the transmission rate, as a result of intervention, is proportional  
207 to the transmission rate at that time. This gives the transmission rate as an exponential function  
208 of time. The main objective is to gradually change the incoming transmission rate,  $\beta_b(t)$ , by a  
209 fraction  $c$  so that the transmission rate at a future time, say  $t_{k+m}$ , where  $m > 0$ , reaches an  
210 optimum value  $(1 - c)\beta_b(t_k)$ . It was shown that this yields [26]:

$$\beta(t) = \begin{cases} \beta_b(t), & t < t_k \\ \beta_b(t_k)e^{g(t)}, & t_k \leq t < t_{k+m} \\ (1 - c)\beta_b(t_k), & t \geq t_{k+m} \end{cases} \quad (5)$$

211 where

$$g(t) = \frac{(t - t_k) \ln(1 - c)}{t_{k+m} - t_k}, \quad c < 1. \quad (6)$$

212 In solving Equation (2), we need to take into consideration the value of the transmission rate,  $\beta(t)$ ,  
213 according to Equations (5) and (6), depending on whether the time,  $t$ , is; (i) before an intervention  
214 takes place, (ii) after the intervention but before the optimum value is reached ; or (iii) after the  
215 optimum value has been achieved. The parameter  $m$  can be considered as the duration, in days,  
216 for the transmission to achieve the optimum value as a result of the intervention.

217 From the last part in Equation (5) we note that when  $0 < c < 1$ , then  $\beta(t_{k+m}) < \beta(t_k)$ ; this  
218 corresponds to the intervention being a mitigation, since it yields a smaller future transmission  
219 rate which represents a reduction by a fraction  $c$  of the incoming transmission rate. We call the  
220 quantity  $100c$  the “percent mitigation”. On the other hand when  $c < 0$  then  $\beta(t_{k+m}) > \beta(t_k)$ ;  
221 this corresponds to the intervention being a relaxation since it yields a larger future transmission  
222 rate which represents an increase by a fraction  $|c|$  of the incoming transmission rate. We call  
223  $100 \times |c|$  the “percent relaxation”. If  $c = 0$  then  $\beta(t) = \beta_b(t_k)$  for  $t > t_k$ . This implies that no  
224 intervention has taken place at  $t_k$ , since the incoming transmission rate remains unchanged after  
225 the supposed intervention. If this transmission rate is used in solving Equation (2), the resulting  
226 infection curve, when  $t > t_k$ , is called the non-intervention curve. We shall see later that the  
227 non-intervention curve plays a significant role in identifying the type of intervention appropriate  
228 in modelling COVID-19 waves. Previous researchers restricted  $c$  to the interval  $(0, 1)$ ; hence they

229 covered only mitigation forces. Through Equation (6), we extend  $c$  to negative values to account  
230 for spikes in the dynamics that may occur as a consequence of relaxation forces. This opens the  
231 way for computationally generating new COVID-19 waves.

## 232 2.3 First wave

233 Ogana et. al. [26] developed the model of the first wave in three distinct phases: baseline,  
234 mitigation and relaxation. We present a summary here because the methods and the findings  
235 are fundamental to developing the models of subsequent waves. The baseline phase is covered in  
236 Section 2.1. The mitigation phase commenced on 9<sup>th</sup> April 2020, following mitigation measures  
237 announced the day before. In modelling this phase, the best agreement with data was obtained by  
238 using,  $\beta_b(t) = 0.184618$ ,  $m = 15$ , and  $c = 0.41$ , (41% mitigation) in Equation (5). The relaxation  
239 phase commenced on 9<sup>th</sup> June 2020, following the lifting of some mitigation measures the day  
240 before and continued until early August. In modelling this phase, the best agreement with data  
241 was obtained by using  $\beta_b(t) = 0.108925$ ,  $m = 15$  and  $c = -0.24$ , (24% relaxation) in Equation  
242 (5). After solution of Equation (2), consolidation of results from the three phases leads to Figure  
243 2 in which the modelled percent infection during the first wave is compared with data. Figure 2.  
244 also shows the beginning of the observed second wave.

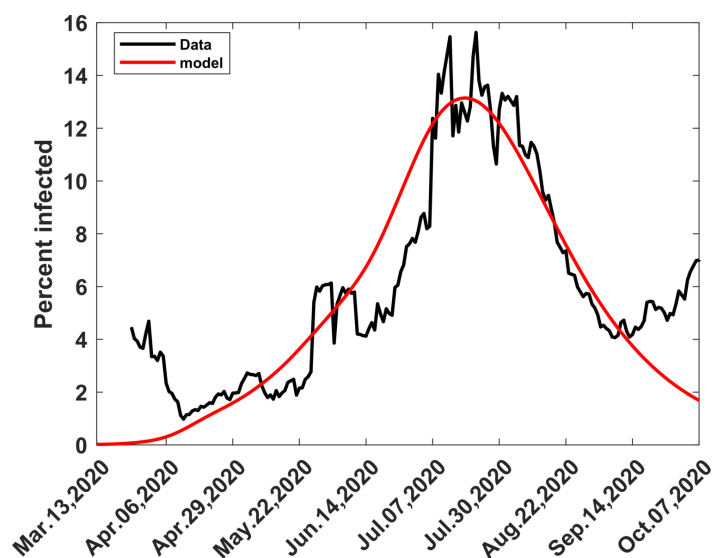

Figure 2: Computed and observed first wave of COVID-19 in Kenya.  $T_W$  is the end of the first wave.

## 245 2.4 Second to Fifth waves

246 Modelling of the second to fifth waves is different from modelling the first wave, although they have  
247 in common the construction of infection scenarios arising from mitigation or relaxation processes.  
248 The principle behind the modelling of the second to fifth waves is the fact that, under suitable  
249 conditions, it is possible to generate a wave by applying a large enough relaxation force, when  
250 infection is decreasing. The generated wave requires some adjustment, however, to make it replicate  
251 the observed wave. We illustrate the process by considering what happens between the first and  
252 second waves, with the understanding that equivalent techniques can be employed between any  
253 two adjacent waves.

## 2.4.1 Relaxation at Varying Percentages When Infection Decreases

From Figure 2 it can be seen that the computed first wave dissipates with time; it represents the path the infection would take in the absence of any further interventions, including the formation of the second wave. We note that the second wave is formed when its trajectory diverges from the trajectory of the computed first wave in early September 2020. We estimated that the divergence started around 3<sup>rd</sup> September 2020; hence this date became the change point between the first and second waves, namely, the time when the first wave ended and the second started. In reality the change is more gradual and takes place over a longer period. We carried out computational experimentation by applying relaxation forces, under several scenarios, with the incoming transmission rate kept at  $\beta_b(t) = 0.135067$ , as established in [26]. The results are in Figure 3, which shows the effect of varying relaxation forces and the application of delay function from one wave to another. For the first scenario, after trying different values of  $m$ , we chose  $m = 30$  and applied varying values of the relaxation ratio,  $c$ , in Equation (5).

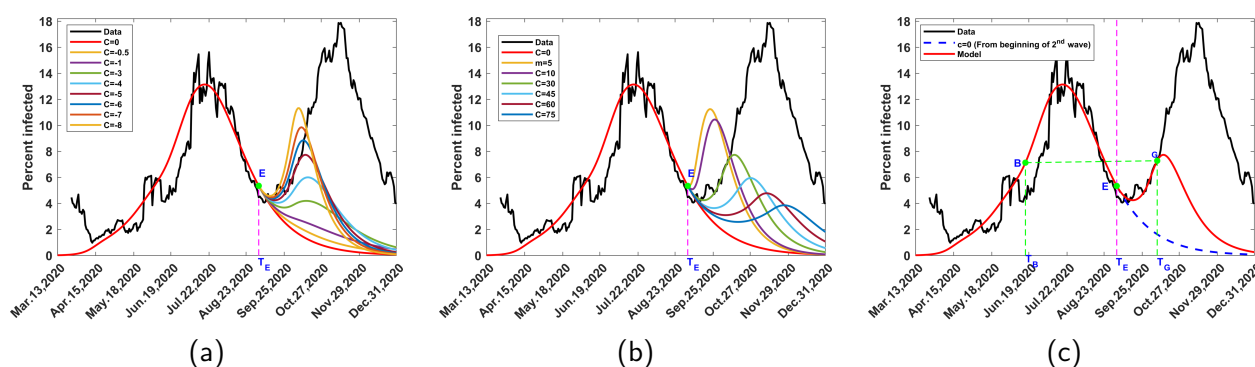

Figure 3: Effects of the applications of relaxations and the application of delay function. E is the Change point from one wave to another, while  $T_E$  is the time at E. (a) Relaxations of varying magnitudes when the infection is decreasing; (b) Relaxations at the same magnitude but with varying optimal duration of change of the transmission rate; (c) Choice of points for application of delay function at the current and previous waves. G is the Point of application of delay function condition, while  $T_G$  is the corresponding time point; B is Point in previous wave where infection at B equals infection at G and  $T_B$  is the time at B.

Subsequent solution of Equation (2), for time after 3<sup>rd</sup> September 2020, yielded Figure 3a. At low relaxation percentages, there does not appear to be any significant effect, but as the percentages increase, ripples begin to form and eventually turn into sharp waves with large crests. The second scenario concerned the case when the waves are generated at the same relaxation force, namely at a given value of  $c$ , but have different values of  $m$ , as shown in Figure 3b. As  $m$  increases the base of the wave becomes broader while the crests of the waves become smaller and they move downwards. These phenomena can be replicated at suitable points in the subsequent waves, with equivalent results to Figures 3a and 3b. Hence, they form the foundation of our modelling the second to fifth waves as outlined in the next three subsections. Every wave will be divided into the fore and back portions, each having different mechanisms of development.

## 2.4.2 Fore portion of the wave by relaxation

The computed wave starts with a fore portion generated by application of a sufficiently large relaxation force. The prime candidate for such a force is a new COVID-19 variant. The force could be enhanced by widespread violation of mitigation measures. Let E be the change point between the preceding wave (Wave 1) and the current wave (Wave 2), with the associated time  $T_E$  and infection  $I_E$  (Fig. 3c). From Figure 3a we have seen that it is possible to generate a series of waves



283 by applying forces of varying relaxation percentages at the point E. To model the fore portion of  
284 the current wave (Wave 2), we proceed according to the following steps.

- 285 i. Choose the initial change point,  $T_E$ , as the time when the trajectory of the observed current  
286 wave (Wave 2) begins to diverge from the modelled tail of the preceding wave (Wave 1),  
287 which dissipates with time, as pointed out in Section 2.4.1.
- 288 ii. Choose the default value  $m = 15$  and select a coarse grid of negative values of  $c$ , preferably  
289 from the interval  $[-10, 0]$ .
- 290 iii. Determine the values at  $T_E$  of the transmission rate,  $\beta$  and the disease variables  $S, I, R$   
291 and  $D$ . Solve Equation (2) for  $t > T_E$  while applying Equation (5), with the incoming  
292 transmission rate.
- 293 iv. Adjust  $T_E$  and  $m$ , if necessary, and repeat step iii., with a finer grid of  $c$ , till an infection  
294 curve is obtained that fits the data well, from the scenario of available curves.

### 295 2.4.3 Application of delay function

296 As Figure 3a shows, the curve obtained in step iv of Section 2.4.2 will reach a maximum and  
297 dissipate at large times. To avoid this fate and force the model to follow the data upwards, we pick  
298 a point on this curve, which lies on, or closest to the data and is not near the maximum point. Let  
299 this point be G, with associated time  $T_G$  and infection  $I_G$  (Figure 3c). From the preceding wave or  
300 any other suitable previous wave, identify a point B, on the left side of the wave, with associated  
301 time  $T_B$  and infection  $I_B$ . We choose B such that  $I_B = I_G$ , that is, the infection at time  $T_B$   
302 equals that at time  $T_G$  (Figure 3c). Since the infections at the two points are equal, we assume  
303 the similarity of dynamics at the two points and hence require that the rest of the time-dependent  
304 variables should also be equal at the two points. We thus impose the condition

$$\mathcal{V}(T_G) = \mathcal{V}(T_B), \quad (7a)$$

where  $\mathcal{V}$  refers to  $S, I, R, D$  and  $\beta$  such that,

$$S_G = S_B, \quad I_G = I_B, \quad R_G = R_B, \quad D_G = D_B, \quad \beta_G = \beta_B. \quad (7b)$$

305 where the subscripts denote the values of the quantities at the corresponding points, as shown in  
306 Figure 3c. Equation (7) is known as the delay function condition, since values at the current time,  
307  $T_G$ , are assigned values at a preceding or previous time,  $T_B$ . The arc  $E - G$  is what we refer to  
308 as the fore portion of the computed wave. Our objective is to make this arc match the observed  
309 infection curve as much as possible, by careful choice of the quantities  $T_E, m, c, T_G$  and  $I_G$ . If the  
310 whole of the preceding wave falls below or above G, then it is not possible to obtain the point  $I_B$   
311 in the preceding wave, such that  $I_G = I_B$ , hence we seek for  $I_B$  from a previous wave.

### 312 2.4.4 Back portion of the wave

313 The back portion of the computed wave begins at the end of the fore portion, namely at  $T_G$   
314 and proceeds for  $t > T_G$ . The fore portion of the wave arises mainly from the effects of the  
315 resultant relaxation force due to new COVID-19 variants together with enhanced non-compliance  
316 to mitigation measures. The back portion, on the other hand, is influenced by resultant relaxation  
317 and mitigation forces as time progresses, mainly due to interventions and the continued effects of  
318 the variants. Given the trajectory of the observed infection, it is important to find out whether  
319 relaxation or mitigation should be applied at a point of intervention. Suppose the intervention  
320 occurs at time  $T_{VN}$  and let the incoming transmission rate of the model be  $\beta_b$ . We generate

321 an infection curve from  $T_{VN}$  by using  $\beta_b$  and then compare the trajectory with data in order to  
322 determine whether the intervention should be a relaxation or mitigation. This is done by using the  
323 following steps.

- 324 1. Let the incoming transmission rate at  $T_{VN}$  be  $\beta_b$ . Choose the default value  $m = 15$ .
- 325 2. Choose values of  $S$ ,  $I$ ,  $R$  and  $D$  at  $T_{VN}$  as initial values. Solve Equation (2) for  $t > T_{VN}$ ,  
326 while adjusting the transmission rate according to Equation (5), with  $c = 0$ , in order to  
327 generate the non-intervention curve (see Section 2.2).
- 328 3. Compare the trajectory of the non-intervention curve with data and one of the following two  
329 cases will arise:

330 **Case 1: After  $T_{VN}$  the data is predominantly above the non-intervention curve.**  
331 This means that the transmission rate for the data is larger than the transmission rate of  
332 the model, namely  $\beta_b$ . To obtain a model whose transmission rate is close to that of the  
333 data, we apply relaxation by choosing negative values of  $c$ , according to Equation (5), and  
334 use the new transmission rate in solving Equation (2) for  $t > T_{VN}$ . By varying  $c$ , and  
335 adjusting  $m$ , if necessary, we can determine a value of the transmission rate that is close  
336 enough to that of the data so as to yield a model infection curve that closely fits the data. For  
337 clarity of computation, we let  $T_{VN} = T_{RX}$  to indicate that the intervention is a relaxation.  
338 Furthermore, the relaxation stays in effect until another intervention is encountered.

339 **Case 2: After  $T_{VN}$ , the data is predominantly below the non-intervention curve.**  
340 This means that the transmission rate for the data is smaller than the transmission rate of the  
341 model, namely  $\beta_b$ . To obtain a model whose transmission rate is close to that of the data,  
342 we apply mitigation by choosing positive values of  $c$ , according to Equation (5), and use the  
343 new transmission rate in solving Equation (2) for  $t > T_{VN}$ . By varying  $c$ , and adjusting  $m$ ,  
344 if necessary, we can determine a value of the transmission rate that is close enough to that  
345 for the data so as to yield a model infection curve that closely fits the data. For clarity of  
346 computation, we let  $T_{VN} = T_{MT}$  indicate that the intervention is a mitigation. Furthermore,  
347 the mitigation stays in effect until another intervention is encountered.

348 In modelling of the back portion, we may use relaxation, mitigation and delay function, as conve-  
349 nient, to align the model with the data, in the event that the model exhibits departure from the  
350 expected trend.

## 351 2.5 Sixth and Seventh waves

352 The methods used to generate the fore portions of the 2<sup>nd</sup> to 5<sup>th</sup> waves were applied to the 6<sup>th</sup>  
353 and 7<sup>th</sup> waves but they did not succeed no matter how large a relaxation force was used. We  
354 noticed a difference in the formation of the two sets of waves. The 2<sup>nd</sup> to 5<sup>th</sup> waves start when a  
355 decreasing infection diverges to the right, forms a concave shape, with a base, then increases, as  
356 in Figure 2 for the observed 2<sup>nd</sup> wave. The 6<sup>th</sup> and 7<sup>th</sup> waves, on the other hand, emerge from an  
357 almost horizontal direction and gradually increase before rising sharply rise, as in Figure 4 on the  
358 formation of the 6<sup>th</sup> wave.

### 359 2.5.1 Fore portion of the wave by exponential growth

360 The fore portions of the 6<sup>th</sup> and 7<sup>th</sup> waves can be modelled by exponential infection. The initial  
361 change point,  $T_E$ , between the current and preceding waves, is determined as before by noting when  
362 the trajectory of the current observed wave diverges from the modelled tail of the preceding wave,

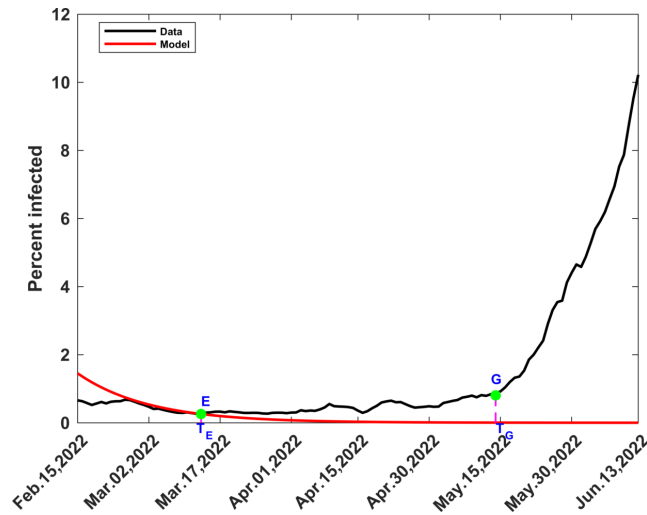

Figure 4: Development of the 6<sup>th</sup> wave.  $E$  is the point from 5<sup>th</sup> to 6<sup>th</sup> wave and  $T_E$  the corresponding time. The black curve represents the data corresponding to the 6<sup>th</sup> wave, while the red curve corresponds to the computed tail of the 5<sup>th</sup> wave.

363 as noted in Figure 4 for the transition from the 5<sup>th</sup> to the 6<sup>th</sup> wave. We observed the following  
364 properties of the variables  $I$  and  $S$  at the beginning of the formation of the 6<sup>th</sup> and 7<sup>th</sup> waves:

- 365 1. Values of  $I(t)$  were quite small,  $< 1\%$ , in the neighbourhood of the change point, and  
366 increased slowly away from the change point.
- 367 2.  $S(t)$  was approximately constant for many days after the change point, till the point say  $G$   
368 in Figure 4, close to where the sharp rise in infection commences.

369 For our model, the arc  $E - G$  forms the fore portion of the wave. Using the 2nd property above,  
370 we assume that  $S(t)$  is approximated by the mean value,  $\bar{S}$ , from  $T_E$  to  $T_G$ . Equation (2b) can  
371 then be written

$$\frac{dI}{dt} = rI, \quad (8)$$

372 where

$$r = \beta\bar{S} - (\gamma + \delta). \quad (9)$$

373 Equation (9) has the solution

$$I(t) = I(T_E)e^{r(t-T_E)} \quad (10)$$

374 For the infection to grow we must have  $r > 0$ , implying that we must choose a transmission rate  
375  $\beta$  such that,

$$\beta > \frac{(\gamma + \delta)}{\bar{S}}. \quad (11)$$

376 Although Equation (11) gives a wide range of choice for  $\beta$ , the value must be selected such that  
377 the computed infections from Equation (10) agree with data as well as possible. This is readily  
378 done by trying different values of  $\beta$  and comparing the exponential curve with data till a suitable  
379 value of  $\beta$  is reached. We denote such a value  $\beta_{XP}$ , to indicate that it is the transmission rate  
380 associated with exponential infection. Using Equation (10), we compute the infected fraction by,

$$I(t) = I(T_E) \exp \{ \beta_{XP} \bar{S} - (\gamma + \delta) || t - T_E || \} \quad (12)$$

381 Exponential growth cannot be allowed to proceed indefinitely. Just like in the 2<sup>nd</sup> to 5<sup>th</sup> waves, we  
382 terminate the fore portions of the 6<sup>th</sup> and 7<sup>th</sup> waves by enforcing the delay function condition at  
383 the point G, as discussed in Section 2.4.3. Hence Equation (12) is used to determine the infection  
384 for  $t$  such that  $T_E \leq t \leq T_G$ . Within this time interval,  $S(t) = \bar{S}$ , a constant, while  $R(t)$  and  
385  $D(t)$  are estimated from

$$R(t_k) = R(t_{k-1}) + \gamma I(t_k), \quad D(t_k) = D(t_{k-1}) + \delta I(t_k), \quad (13)$$

386 through integration of Equations (2c) and (2d), respectively.

## 387 2.5.2 Back portion of the wave

388 The back portion of the wave starts at  $T_G$  and its modelling proceeds as described in Section 2.4.4,  
389 with the following points to be noted:

- 390 • The first intervention is a relaxation at  $T_G$ . It produces a model, which replicates the left  
391 half of the wave.
- 392 • The second intervention is a mitigation, near the apex of the wave, and it produces a model  
393 which replicates the right half of the wave.

# 394 3 RESULTS

395 Presentation of results here will be done one wave at a time; thereafter all the waves will be  
396 consolidated into one time series. COVID-19 data was obtained from the Ministry of Health,  
397 Kenya [38] and Worldometer [39]. We obtained information on SARS-CoV-2 lineages and variants  
398 from Gathii et. al [3] and Nasimiyu et. al. [40]. After the first usage, we will refer to lineages and  
399 variants without attaching SARS-CoV-2 every time.

## 400 3.1 First Wave

401 The first wave was modelled by Ogana et. al. [26] and a summary of the results is given in Section  
402 2.3, with the complete wave shown in Figure 2. It was driven largely by the global parental SARS-  
403 CoV-2 lineage B.1 that lasted from March 2020 to September 2020 [3, 40]. The fluctuations in the  
404 wave were, however, partly influenced by the mitigation measures imposed during 8th April 2020  
405 to 8th June 2020 and the lifting of some of these measures from 8th June 2020. These actions  
406 led to unique mitigation and relaxation dynamics different from what would have happened if the  
407 disease had been allowed to spread without any intervention [26].

## 408 3.2 Second to Fifth Waves

409 We present the results one wave at a time. The procedures are almost identical; the differences  
410 occur in the dates when major events and decisions take place, and hence the attendant output.

### 411 3.2.1 Second Wave

412 The methods in Section 2.4.2, led to  $\beta_b = 0.13507$ ,  $m = 30$ ,  $c = -4$  (400% relaxation) and  $T_E =$   
413 03-Sep-20. From Section 2.4.3, we identified  $T_G = 08-Oct-20$  and  $I_G = 0.07394$ . Comparison  
414 with previous waves led to  $T_B = 17-Jun-20$  and  $I_B = 0.07394$ . Equation (7) yielded the values  
415 in column 3, Section A2 of Table A1. The fore portion of the wave is the arc  $E - G$ . The  
416 methods in Section 2.4.4, applied at  $T_{VN} = T_G = 08-Oct-20$  with  $\beta_b = 0.67533$ , led to the  
417 non-intervention curve (blue dashed curve), predominantly below data as shown in Figure 5. Hence

418 we let  $T_{RX} = T_{VN}$  and undertook final relaxation for  $t > T_{RX}$  using  $c = -0.26$  (26% relaxation)  
419 and  $m = 15$ . This gave the back portion of the wave which, combined with the fore portion, yielded the complete 2<sup>nd</sup> wave shown in Figure 5.

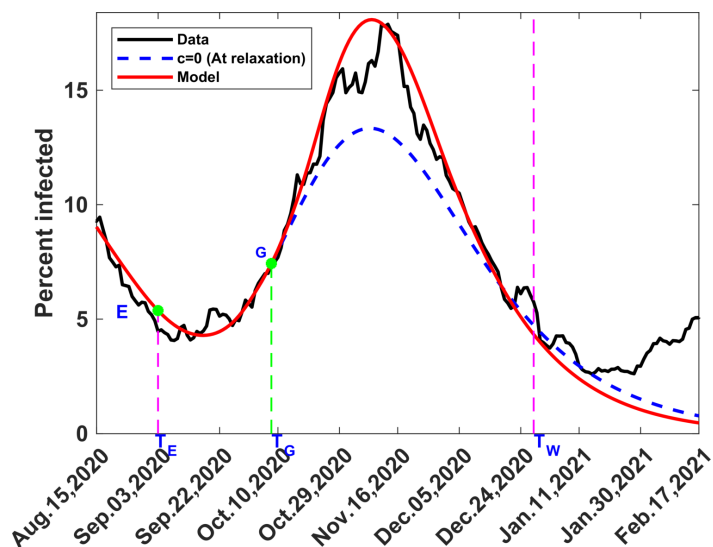

Figure 5: Observed and computed 2<sup>nd</sup> Wave of COVID-19 in Kenya. The blue curve represents the no-intervention curve, black represents the data while the red is the model.  $E$  is the change point from first to the second wave, with the corresponding time  $T_E$ ;  $G$  is the point of application of delay function condition and  $T_G$  the corresponding time;  $T_W$  shows the end of second wave.

420

### 421 3.2.2 Third Wave

422 The methods in Section 2.4.2, led to  $\beta_b = 0.17018$ ,  $m = 45$ ,  $c = -9$  (900% relaxation) and  
423  $T_E = 28$ – Dec–20. From Section 2.4.3, we identified  $T_G = 10$ –Feb–21 and  $I_G = 0.04099$ .  
424 Comparison with previous waves led to  $T_B = 26$ –May–20 and  $I_B = 0.04099$ . Equation (7)  
425 yielded the values in column 4, Section A2 of Table A1. The fore portion of the wave is the arc  
426  $E - G$ . Enforcement of relaxation at  $T_G$  resulted in a model to the left of data. To align the model  
427 with data, we carried out computation for  $t > t_G$ , with  $c = 0$ , and chose  $T_{VN} = 21$ –Feb–21  
428 with  $\beta_b = 0.10892$ . The methods in Section 2.4.4, led to the non-intervention curve (blue dashed  
429 curve), predominantly below data as shown in Figure 6. Hence we let  $T_{RX} = T_{VN}$  and undertook  
430 final relaxation for  $t > T_{RX}$  using  $c = -0.5$  (50% relaxation) and  $m = 10$ . This gave the back  
431 portion of the wave which, combined with the fore portion, yielded the complete 3<sup>rd</sup> wave shown  
432 in Figure 6.

### 433 3.2.3 Fourth Wave

434 The 4<sup>th</sup> wave of COVID-19 in Kenya appeared in two prominent spikes of different amplitudes.  
435 We modeled each spike separately before combining them to form the complete 4<sup>th</sup> wave. For  
436 convenience of presentation, we will adopt some notations as follows. There is a change point  
437 from the 3<sup>rd</sup> wave to the 1<sup>st</sup> spike which we label  $E1$ ; there is another change point from the 1<sup>st</sup>  
438 to the 2<sup>nd</sup> spike labeled as  $E2$ . We let  $G1$  and  $G2$  be the delay function points in the 1<sup>st</sup> and 2<sup>nd</sup>  
439 spikes, respectively, and  $B1$  and  $B2$  be the points for application of Equation (7) for values at  $G1$   
440 and  $G2$ , respectively.

441 **First Spike:** The methods in Section 2.4.2, led to  $\beta_b = 0.16339$ ,  $m = 30$ ,  $c = -7$  (700%  
442 relaxation) and the 1<sup>st</sup> change point,  $T_{E1} = 02$ –May–21. From Section 2.4.3, we identified  $T_{G1} =$

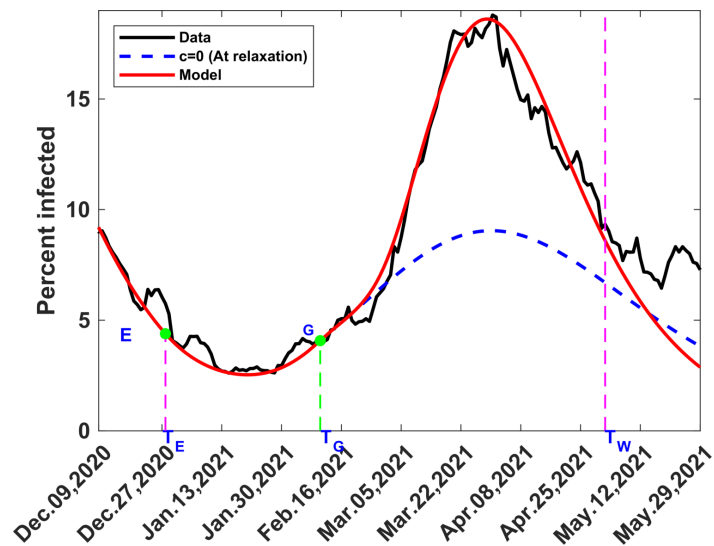

Figure 6: Computed and observed third wave of COVID-19 in Kenya, with the no-intervention curve shown in blue dashed curve.  $E$  represents the change point from second to the third wave and  $T_E$  the corresponding time;  $G$  is the point of application of delay function condition, at time  $T_G$ ;  $T_W$  represents the end of third wave.

443 01-Jun-21 and  $I_{G1} = 0.0724$ . Comparison with previous waves led to  $T_{B1} = 28\text{-Feb-21}$  and  
 444  $I_{B1} = 0.0724$ . Equation (7) yielded the values in column 5, Section A2 of Table A1 The fore  
 445 portion of the 1st spike is the arc  $E1 - G1$ . The methods in Section 2.4.4, applied at  $T_{VN} = T_{G1} =$   
 446 01-Jun-21 with  $\beta_b = 1.3071$ , led to the non-intervention curve (blue dashed curve), predominantly  
 447 above data as shown in Figure 7. Hence, we let  $T_{MT} = T_{VN}$  and undertook final mitigation for  
 448  $t > T_{MT}$  using  $c = 0.5$  (50% mitigation) and  $m = 30$ . This gave the back portion of the 1st spike  
 which, combined with the fore portion, yielded the complete 1<sup>st</sup> spike in Figure 7.

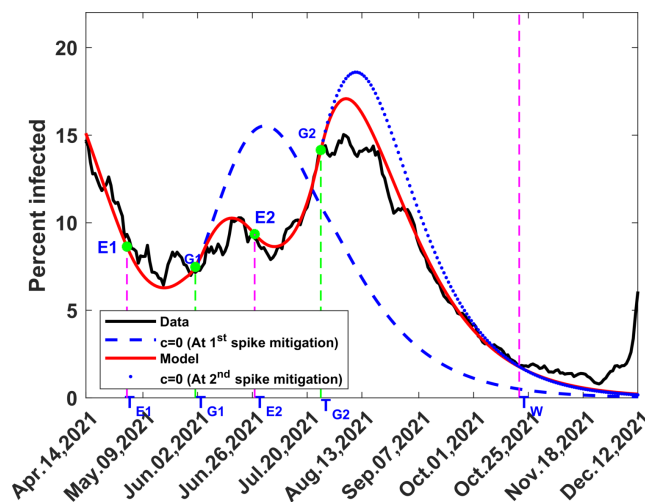

Figure 7: Computed and observed fourth wave of COVID-19 in Kenya. The blue dashed curve represents the no-intervention curve for the first spike while blue dotted curve represents the no-intervention curve for the second spike.  $E1$  is the change point from 3<sup>rd</sup> wave to the 1<sup>st</sup> spike of the 4<sup>th</sup> wave at time  $T_{E1}$ ;  $G1$  is the point of application of delay function condition in the 1<sup>st</sup> spike at time  $T_{G1}$ , while  $E2$  is the change point from 1<sup>st</sup> to 2<sup>nd</sup> spike at time  $T_{E2}$  and  $G2$  the point of application of delay function condition in the 2<sup>nd</sup> spike at time  $T_{G2}$ ;  $T_W$  is the end of the 4<sup>th</sup> wave.

450 **Second Spike** The methods in Section 2.4.2, led to  $\beta_b = 0.079341$ ,  $m = 30$ ,  $c = -2.9$  (290%  
451 relaxation). The 2<sup>nd</sup> change point,  $T_{E2} = 27\text{-Jun-21}$ . From Section 2.4.3, we identified  $T_{G2} = 26\text{-}$   
452  $\text{Jul-21}$  and  $I_{G2} = 0.143$ . Comparison with previous waves led to  $T_{B2} = 14\text{-Mar-21}$  and  $I_{B2} = 0.143$ .  
453 Equation (7) yielded the values in column 6, Section A2 of Table A1. The fore portion of the 2nd  
454 spike is the arc  $E2 - G2$ . The methods in Section 2.4.4, applied at  $T_{VN} = T_{G2} = 26\text{-Jul-21}$   
455 with  $\beta_b = 0.29571$ , led to the no-intervention curve blue dotted curve, predominantly above data  
456 as shown in Figure 7. Hence, we let  $T_{MT} = T_{VN}$  and undertook final mitigation for  $t > T_{MT}$   
457 using  $c = 0.2$  (20% mitigation) and  $m = 15$ . This gave the back portion of the 2nd spike which,  
458 combined with the fore portion, yielded the complete 2<sup>nd</sup> spike as shown in Figure 7. Combination  
459 of the 1<sup>st</sup> and 2<sup>nd</sup> spikes led to the complete 4<sup>th</sup> wave, in Figure 7.

### 460 3.2.4 Fifth Wave

461 For convenience of presentation, we will adopt some notations as follows. There will be two delay  
462 function points which we label  $G1$  and  $G2$ , respectively, and we let  $B1$  and  $B2$  be the points for  
463 application of Equation (7) for values at  $G1$  and  $G2$ , respectively.

464 The methods in Section 2.4.2, led to  $\beta_b = 0.13071$ ,  $m = 60$ ,  $c = -10$  (1000% relaxation) and  $TE =$   
465  $21\text{-Oct-21}$ . From Section 2.4.3, we identified  $T_{G1} = 02\text{-Dec-21}$  and  $I_{G1} = 0.0147$ . Comparison  
466 with previous waves led to  $T_{B1} = 27\text{-Apr-20}$  and  $I_{B1} = 0.0147$ . Equation (7) yielded the values  
467 in column 7, Section A2 of Table A1. The methods in Section 2.4.4, applied at  $T_{VN} = T_{G1} =$   
468  $02\text{-Dec-21}$ , led to the non-intervention curve (blue dashed curve), predominantly below data in  
469 Figure 8. Hence, we let  $T_{RX} = T_{VN}$  with  $\beta_B = 0.67286$  and undertook relaxation for  $t > T_{RX}$   
470 using  $c = -4$  (400% relaxation) and  $m = 15$ . The resulting model followed data for a while before  
471 tilting to the right. To realign the model with the data, we chose a 2nd delay function point,  
472 before the tilt, at  $T_{G2} = 14\text{-Dec-21}$ , with  $I_{G2} = 0.0988$ . Comparison with previous waves led to  
473  $T_{B2} = 16\text{-Jul-21}$  and  $I_{B2} = 0.0985$ . Equation (7) yielded the values in column 7, Section A4 of  
474 Table A1. The fore portion of the wave is the arc  $E - G2$ . The methods in Section 2.4.3, applied  
475 at  $T_{VN} = T_{G2} = 14\text{-Dec-21}$  with  $\beta_b = 0.39473$  led to the non-intervention curve (blue dotted  
476 curve), predominantly below data in Figure 8. Hence we let  $T_{RX} = T_{VN} = T_{G2}$  and undertook  
477 final relaxation for  $t > T_{RX}$  using  $c = -3.5$  (350% relaxation) and  $m = 5$ . This finalized the back  
478 portion of the wave, which, on combination with the fore portion, resulted in the complete 5th  
479 wave, in Figure 8.

## 480 3.3 Sixth and Seventh waves

481 The fore portions of the 6th and 7th waves were generated by exponential approximation, rather  
482 than by relaxation, as was the case with the previous waves. The results are, therefore, presented  
483 separately in this section.

### 484 3.3.1 Sixth Wave

485 The methods in Section 2.5.1, led to  $T_E = 13\text{-Mar-22}$ ,  $\bar{S} = 0.0036$ ,  $\beta_{XP} = 238$  and  $T_G = 14\text{-}$   
486  $\text{May-22}$ . Equations (12) and (13) yielded disease variables from  $T_E$  to  $T_G$  such that  $I_G = 0.00817$ .  
487 Using Section 2.4.3, comparison with previous waves led to  $T_B = 16\text{-Apr-20}$  and  $I_B = 0.00827$ .  
488 Equation (7) yielded the values in column 3, Section A2 of Table A2. The fore portion of the  
489 wave is the arc  $E - G$ . The methods in Section 2.4.4, applied at  $T_{VN} = T_G = 14\text{-May-22}$ , with  
490  $\beta_b = 0.84538$  led to the non-intervention curve (blue dashed curve), predominantly below data  
491 on the left side of Figure 9. Hence, we let  $T_{RX} = T_{VN}$  and undertook relaxation for  $t > T_{RX}$   
492 using  $c = -0.15$  (15% relaxation) and  $m = 15$ . The solution yielded a model which closely fit  
493 the left hand side of the wave, as given in Figure 9. To complete the model, we effected another

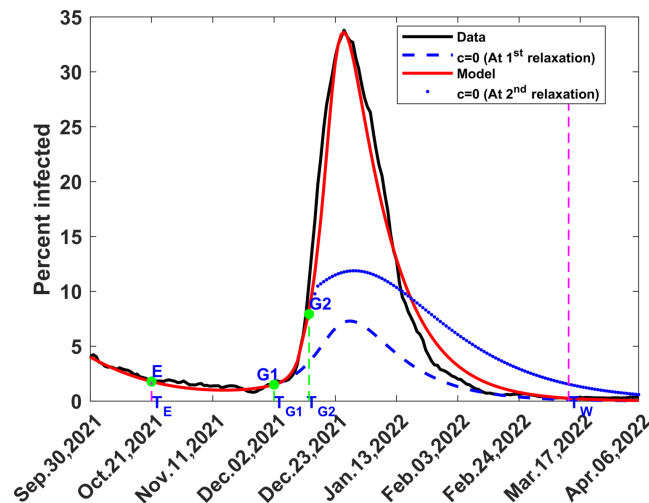

Figure 8: Computed and observed fifth wave of COVID-19 in Kenya. The dashed and dotted blue curves represent the non-intervention curves, red is the computed infections and black the data.  $E$  is the change point from 4<sup>th</sup> wave to 5<sup>th</sup> wave at time  $T_E$ ;  $G_1$  the first point of application of delay function condition at time  $T_{G_1}$ , and  $G_2$  the second point of application of delay function condition at time  $T_{G_2}$ ;  $T_W$  is the end of 5<sup>th</sup> wave.

494 intervention at  $T_{VN} = 17\text{-Jun-22}$ , near the apex of the wave. The methods in Section 2.4.4, applied  
 495 at  $T_{VN} = 17\text{-Jun-22}$  with  $\beta_b = 0.169597$  led to the non-intervention curve (blue dotted curve),  
 496 predominantly above data on the right side of Figure 9. Hence we let  $T_{MT} = T_{VN}$  and undertook  
 497 mitigation for  $t > T_{MT}$  using  $c = 0.82$  (82% mitigation) and  $m = 15$ . The solution completed the  
 498 back portion of the curve which, on combination with the fore portion, resulted in the complete  
 499 6<sup>th</sup> wave, as given in Figure 9.

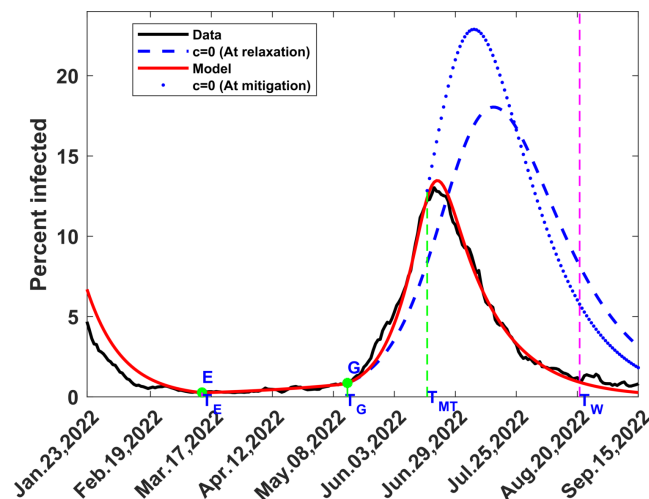

Figure 9: Computed and observed sixth wave of COVID-19 in Kenya. The blue curves represent the non-intervention curves, red the computed infections and black the data.  $E$  is the change point from 5<sup>th</sup> to 6<sup>th</sup> wave, with the corresponding time,  $T_E$ ,  $G$  the point of application of delay function condition at time  $T_G$ ,  $T_{MT}$  the time at which to apply mitigation and  $T_W$  the end of 6<sup>th</sup> wave.

### 500 3.3.2 Seventh Wave

501 The methods in Section 2.5.1, led to  $T_E = 22\text{-Aug-22}$ ,  $\bar{S} = 0.63$ ,  $\beta_{XP} = 0.11$  and  $T_G = 10\text{-Oct-}$   
 502  $22$ . Equations (12)–(13) yielded disease variables from  $T_E$  to  $T_G$  such that  $I_G = 0.0101$ . Using  
 503 Section 2.4.3, comparison with previous waves led to  $T_B = 17\text{-May-22}$  and  $I_B = 0.0105$ . Equation



504 (7) yielded the values in column 4, Section A2 of Table A2. The fore portion of the wave is the  
 505 arc  $E - G$ . The methods in Section 2.4.4, applied at  $T_{VN} = T_G = 10\text{-Oct-22}$ , with  $\beta_b = 0.029875$   
 506 led to the non-intervention curve (blue dashed curve), predominantly below data on the left side of  
 507 Figure 10. Hence, we let  $T_{RX} = T_{VN}$  and undertook relaxation for  $t > T_{RX}$  using  $c = -0.2$  (20%  
 508 relaxation) and  $m = 15$ . The solution yielded a model which closely fit the left hand side of the  
 509 wave, as given in Figure 10. To complete the model, we effected another intervention at  $T_{VN} =$   
 510  $05\text{-Nov-22}$ , near the apex of the wave. The methods 2.4.4, applied at  $T_{VN} = 05\text{-Jun-22}$  with  
 511  $\beta_b = 0.1781$  led to the non-intervention curve (blue dotted curve), predominantly above data on  
 512 the right side of Figure 10. Hence we let  $T_{MT} = T_{VN}$  and undertook final mitigation for  $t > T_{MT}$   
 513 using  $c = 0.68$  (68% mitigation) and  $m = 10$ . The solution completed the back portion of the  
 514 wave which, on combination with the fore portion, resulted in the complete 7th wave, as given in  
 515 Figure 10. We noticed a lot of noise in the data from mid December 2022 before it stopped being  
 516 posted in the public portal of the Ministry of Health website on 26 January 2023 [38].

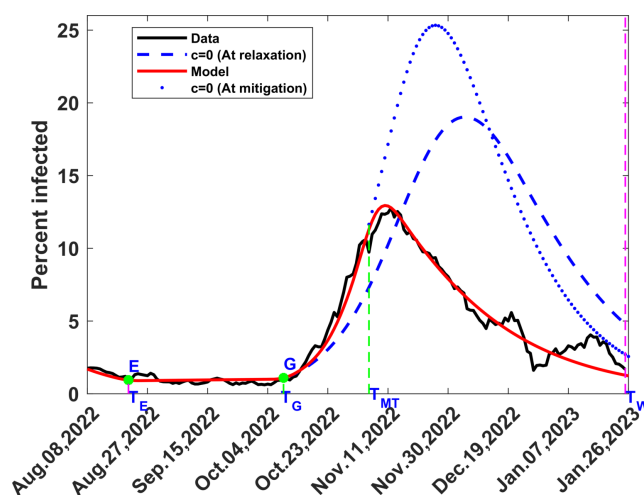

Figure 10: Computed and observed seventh wave of COVID-19 in Kenya. The blue dotted and dashed curves represent the non-intervention curves, red the computed infections and black the data.  $E$  is the change point from 6<sup>th</sup> to 7<sup>th</sup> wave at time  $T_E$ ,  $G$  the point of application of delay function condition at time  $T_G$ ,  $T_{MT}$  the time at which mitigation is applied and  $T_W$  the end of 7<sup>th</sup> wave.

### 517 3.4 Complete COVID-19 waves in Kenya

518 Consolidation of Figure 2 and Figures 5 to 10, without the no-intervention curves, yields the  
 519 complete COVID-19 waves in Kenya, as shown in Figure 11, where the model results are compared  
 520 with data.

521 In Table 1, we present the amplitudes and durations of the waves. The durations are based on  
 522 the times between identified change points and may differ from those arrived at from clinical  
 523 considerations [40]. The strongest wave was the 5th at 33.6% infected and the weakest was the  
 524 7th wave at 13.0% infected. The longest lasting was the 1st wave, with duration of 174 days while  
 525 the shortest was the 2nd with duration of 116 days.

## 526 4 DISCUSSION AND CONCLUSIONS

527 In this article, we have formulated, analysed and computed a COVID-19 model that is based on  
 528 the generation of two types of new waves. The first type is a wave generated from a vertically  
 529 decreasing infection that diverges to the right, forms a bowl-like shape before increasing upwards,

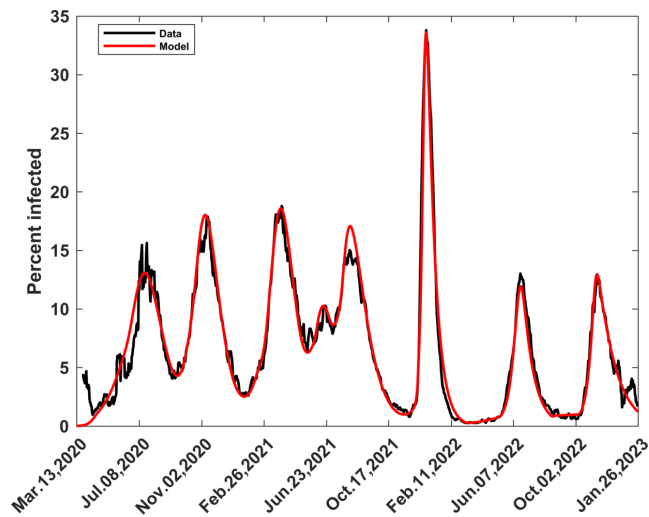

Figure 11: Computed and observed complete COVID-19 Waves in Kenya

|                        | Wave 1 | Wave 2 | Wave 3 | Wave 4 | Wave 5 | Wave 6 | Wave 7 |
|------------------------|--------|--------|--------|--------|--------|--------|--------|
| Amplitude (% infected) | 13.1   | 18.0   | 18.6   | 17.1   | 33.6   | 13.6   | 13.0   |
| Duration, (Days)       | 174    | 116    | 125    | 172    | 143    | 161    | 157    |

Table 1: Kenya COVID-19 wave amplitudes in 7-day averaged percent infected and durations in days.

530 as shown in the second to the fifth wave; such a wave is modelled by exerting a sufficiently large  
 531 relaxation force. Waves were generated by using relaxation ratios ranging from  $c = -2.9$  (290%  
 532 relaxation) to  $c = 10$  (1000% relaxation). The stronger the wave the larger the relaxation ratio  
 533 required, thus reflecting the force necessary to follow the contour of the wave sufficiently, before  
 534 application of the delay function. The second type is a wave that emerges from very low infections  
 535 that are nearly horizontal, as shown by the sixth and seventh waves; such a wave is modelled  
 536 through an exponential infection, involving the transmission rate for exponential infection,  $\beta_{XP}$ ;  
 537 this quantity had two vastly different values, namely 238 for the sixth wave and 0.11 for the seventh  
 538 wave. There is no anomaly. The values are a result of choosing  $\beta_{XP}$  to satisfy Equation (11), with  
 539  $\bar{S} = 0.00036$  for the 6th wave and  $\bar{S} = 0.63$  for the 7th wave. Although the models were the same  
 540 within the two groups of waves, they were implemented to suit the characteristics of each wave.  
 541 The results depicted in Figures 5 to 11 agree quite well with data, apart from areas where there  
 542 are spikes, or there is noise, in the data. No other numerical results are available for comparison,  
 543 for the complete COVID-19 waves in Kenya. Indeed the closest to this work are results for a few  
 544 waves in India, by Gosh et. al. [32].

545 The change point that determines the transition from one wave to the next is obtained by noting  
 546 the tail of the modelled preceding wave and where the trajectory of the new observed infection  
 547 begins to diverge from this tail. This point of divergence forms an initial guess to the change point.  
 548 The final change point is obtained after carrying out the procedures in Section 2.4.2 and will usually  
 549 be within 2 weeks of the initial point. In Table A3, we have indicated the timeline of events relevant  
 550 to COVID-19 dynamics in Kenya, including relaxation and mitigation events due to intervention.  
 551 We have also indicated the months the variants of SARS-CoV-2 were dominant, as determined  
 552 from genomic analysis [3, 40]. Finally, we have indicated the change points at which we decided to  
 553 generate waves by application of large relaxation forces or through exponential approximation. The

554 change points that we computed are within the months when genomic analyses showed particular  
555 variants of SARS-CoV-2 to be dominant; in most cases, they were actually at the beginning or in the  
556 middle of such months. This makes us conclude that the dominant variants of SARS-CoV-2 were  
557 the major sources of the relaxation forces that were capable of changing the infection trajectories.  
558 There were other relaxation forces relating to the lifting of, or noncompliance to, certain mitigation  
559 measures. In our view, such forces slightly enhanced the effects of the main drivers but they were  
560 not, on their own, sufficient to lead to generation of new waves.

561 The duration for optimum change in the transmission rate,  $m$ , had a value of 30 for waves whose  
562 bases took a shorter time to form, like the 2nd wave and spikes in the 4th wave. It had larger  
563 values for waves whose bases took longer to form, for instance 45 for the 3rd wave and 60 for the  
564 5th. As the waves proceeded, their shapes were influenced by relaxation and mitigation forces from  
565 various sources, including interventions. This aspect was modelled through appropriate application  
566 of relaxation or mitigation by noting the position of the observed trajectory of infection relative to  
567 the no-intervention curve. The values of  $m$  here were either 10 or 15, apart from the 1st spike in  
568 the 4th wave for which it was 30. This implied that most interventions in the back portion of the  
569 wave resulted in the optimum change of the transmission rate being achieved close to the default  
570 value of 15 days.

571 We recommend extension of the developments in this article to investigations in several directions,  
572 as indicated hereunder:

- 573 1. Mathematical analyses to unravel the theory behind turning a decreasing contour of infection  
574 into an increasing contour through application of a large enough relaxation force. So far this  
575 observation is purely computational or numerical.
- 576 2. The method used to generate the 6th and 7th waves, combined with diligent monitoring,  
577 can be applied to detect a future wave of COVID-19 or other epidemic.
- 578 3. Application of smaller values of  $m$ , the optimum duration of optimum change of the trans-  
579 mission rate, together with use of no-intervention curve, could lead to detection of spikes of  
580 smaller amplitudes, although at a higher computational effort.
- 581 4. The methods described here can be used as a predictive tool if time series techniques are  
582 combined with computation of no-intervention curves.

583 **Acknowledgements:** We acknowledge Alice Wangui Wachira, Anne Kanyua Kinyua and Lucy  
584 Nyanchama for their assistance with data collection.

585

586 **Data sources:** All the data used is in the public domain [38],[39].

## 587 References

- 588 [1] Government of Kenya, "Kenya Gazette Supplement No. 41. The Public Health Act (Cap.242).  
589 The Public Health (COVID-19 Restriction of Movement of Persons and Related Measures)  
590 Rules," *Kenya Gazette*, April 16 2020.
- 591 [2] H. Tegally, E. Wilkinson, M. Giovanetti, A. Iranzadeh, V. Fonseca, J. Giandhari, D. Doolabh,  
592 S. Pillay, E. J. San, N. Msomi, *et al.*, "Detection of a SARS-CoV-2 variant of concern in  
593 South Africa," *Nature*, vol. 592, no. 7854, pp. 438–443, 2021.
- 594 [3] G. Kimita, J. Nyataya, E. Omuseni, F. Sigei, A. Lemtudo, E. Muthanje, B. Andika, R. Liyai,  
595 R. Githii, C. Masakwe, *et al.*, "Temporal lineage replacements and dominance of imported

- 596 variants of concern during the covid-19 pandemic in kenya,” *Communications Medicine*, vol. 2,  
597 no. 1, p. 103, 2022.
- 598 [4] W. H. Organization *et al.*, “Calibrating long-term non-pharmaceutical interventions for  
599 COVID-19: principles and facilitation tools,” tech. rep., WHO Regional Office for the Western  
600 Pacific, 2020.
- 601 [5] M. J. Keeling, E. M. Hill, E. E. Gorsich, B. Penman, G. Guyver-Fletcher, A. Holmes, T. Leng,  
602 H. McKimm, M. Tamborrino, L. Dyson, *et al.*, “Predictions of COVID-19 dynamics in the UK:  
603 Short-term forecasting and analysis of potential exit strategies,” *PLoS computational biology*,  
604 vol. 17, no. 1, p. e1008619, 2021.
- 605 [6] World Health Organization, African Region, “COVID-19 Vaccines.” [https://www.afro.](https://www.afro.who.int/health-topics/coronavirus-covid-19/vaccines)  
606 [who.int/health-topics/coronavirus-covid-19/vaccines](https://www.afro.who.int/health-topics/coronavirus-covid-19/vaccines), 2023. Accessed 1–6 March  
607 2023.
- 608 [7] Centers for Disease Control and Prevention (CDC), “COVID-19 Treatments and  
609 Medications.” [https://www.cdc.gov/coronavirus/2019-ncov/your-health/](https://www.cdc.gov/coronavirus/2019-ncov/your-health/treatment-for-severe-illness.html)  
610 [treatment-for-severe-illness.html](https://www.cdc.gov/coronavirus/2019-ncov/your-health/treatment-for-severe-illness.html), 2023. Accessed 1–6 March 2023.
- 611 [8] S. Orangi, J. Pinchoff, D. Mwanga, T. Abuya, M. Hamaluba, G. Warimwe, K. Austrian, and  
612 E. Barasa, “Assessing the level and determinants of COVID-19 vaccine confidence in Kenya,”  
613 *Vaccines*, vol. 9, no. 8, p. 936, 2021.
- 614 [9] S. Funk, M. Salathé, and V. A. Jansen, “Modelling the influence of human behaviour on the  
615 spread of infectious diseases: a review,” *Journal of the Royal Society Interface*, vol. 7, no. 50,  
616 pp. 1247–1256, 2010.
- 617 [10] G. A. Tessema, Y. Kinfu, B. A. Dachew, A. G. Tesema, Y. Assefa, K. A. Alene, A. F. Aregay,  
618 M. B. Ayalew, W. M. Bezabhe, A. G. Bali, *et al.*, “The COVID-19 pandemic and healthcare  
619 systems in Africa: a scoping review of preparedness, impact and response,” *BMJ global health*,  
620 vol. 6, no. 12, p. e007179, 2021.
- 621 [11] M. Serhani and H. Labbardi, “Mathematical modeling of COVID-19 spreading with asymp-  
622 tomatic infected and interacting peoples,” *Journal of Applied Mathematics and Computing*,  
623 vol. 66, no. 1-2, pp. 1–20, 2021.
- 624 [12] R. Anguelov, J. Banasiak, C. Bright, J. Lubuma, and R. Ouifki, “The big unknown: The  
625 asymptomatic spread of COVID-19,” *Biomath*, vol. 9, no. 1, pp. ID–2005103, 2020.
- 626 [13] M. Tomochi and M. Kono, “A mathematical model for COVID-19 pandemic—SIIR model:  
627 Effects of asymptomatic individuals,” *Journal of general and family medicine*, vol. 22, no. 1,  
628 pp. 5–14, 2021.
- 629 [14] M. Paleker, Y. Tembo, M. Davies, H. Mahomed, D. Pienaar, S. Madhi, and K. McCarthy,  
630 “Asymptomatic COVID-19 in South Africa—implications for the control of transmission,” *Pub-*  
631 *lic Health Action*, vol. 11, no. 2, pp. 58–60, 2021.
- 632 [15] L. Cao and Q. Liu, “COVID-19 modeling: a review,” *medRxiv*, pp. 2022–08, 2022.
- 633 [16] P. Cintra, M. Citeli, and F. Fontinele, “Mathematical models for describing and predicting the  
634 COVID-19 pandemic crisis,” *arXiv preprint arXiv:2006.02507*, 2020.
- 635 [17] L. Melo, “Modeling COVID-19 Spread through the SEIRD Epidemic Model and Optimal  
636 Control,” *Proceedings of GREAT Day*, vol. 2021, no. 1, p. 19, 2022.

- 637 [18] R. Bhadade, A. Anuse, R. Kute, and M. Munot, "SEIRD Model for Forecasting Spread of  
638 COVID-19," *Indian Journal of Science and Technology*, vol. 15, no. 41, pp. 2162–2170, 2022.
- 639 [19] A. Leontitsis, A. Senok, A. Alsheikh-Ali, Y. Al Nasser, T. Loney, and A. Alshamsi, "SEAHIR:  
640 A specialized compartmental model for covid-19," *International journal of environmental re-  
641 search and public health*, vol. 18, no. 5, p. 2667, 2021.
- 642 [20] A. Dutta, "COVID-19 waves: variant dynamics and control," *Scientific Reports*, vol. 12, no. 1,  
643 p. 9332, 2022.
- 644 [21] M. Kimathi, S. Mwalili, V. Ojiambo, and D. K. Gathungu, "Age-structured model for COVID-  
645 19: Effectiveness of social distancing and contact reduction in Kenya," *Infectious Disease  
646 Modelling*, vol. 6, pp. 15–23, 2021.
- 647 [22] J. Malinzi, V. O. Juma, C. E. Madubueze, J. Mwaonaji, G. N. Nkem, E. Mwakilama, T. V.  
648 Mupedza, V. N. Chiteri, E. A. Bakare, I. L.-Z. Moyo, *et al.*, "COVID-19 transmission dynamics  
649 and the impact of vaccination: modelling, analysis and simulations," *Royal Society Open  
650 Science*, vol. 10, no. 7, p. 221656, 2023.
- 651 [23] J. T. Wu, K. Leung, and G. M. Leung, "Nowcasting and forecasting the potential domestic  
652 and international spread of the 2019-ncov outbreak originating in wuhan, china: a modelling  
653 study," *The lancet*, vol. 395, no. 10225, pp. 689–697, 2020.
- 654 [24] Y. N. Kyrychko, K. B. Blyuss, and I. Brovchenko, "Mathematical modelling of the dynamics  
655 and containment of covid-19 in ukraine," *Scientific reports*, vol. 10, no. 1, p. 19662, 2020.
- 656 [25] O. Morozova, Z. R. Li, and F. W. Crawford, "One year of modeling and forecasting covid-  
657 19 transmission to support policymakers in connecticut," *Scientific reports*, vol. 11, no. 1,  
658 p. 20271, 2021.
- 659 [26] W. Ogana, V. O. Juma, and W. D. Bulimo, "A SIRD model applied to COVID-19 dynamics  
660 and intervention strategies during the first wave in Kenya," *medRxiv*, pp. 2021–03, 2021.
- 661 [27] I. M. Wangari, S. Sewe, G. Kimathi, M. Wainaina, V. Kitetu, and W. Kaluki, "Mathemat-  
662 ical modelling of COVID-19 transmission in Kenya: a model with reinfection transmission  
663 mechanism," *Computational and Mathematical Methods in Medicine*, vol. 2021, pp. 1–18,  
664 2021.
- 665 [28] S. P. Brand, J. Ojal, R. Aziza, V. Were, E. A. Okiro, I. K. Kombe, C. Mburu, M. Ogero,  
666 A. Agweyu, G. M. Warimwe, *et al.*, "COVID-19 transmission dynamics underlying epidemic  
667 waves in Kenya," *Science*, vol. 374, no. 6570, pp. 989–994, 2021.
- 668 [29] J. W. Kiarie, S. M. Mwalili, and R. W. Mbogo, "COVID-19 pandemic situation in Kenya: A  
669 data driven SEIR model," *Medical Research Archives*, vol. 10, no. 2, 2022.
- 670 [30] E. Kaxiras and G. Neofotistos, "Multiple epidemic wave model of the covid-19 pandemic:  
671 modeling study," *Journal of medical Internet research*, vol. 22, no. 7, p. e20912, 2020.
- 672 [31] G. Perakis, D. Singhvi, O. Skali Lami, and L. Thayaparan, "COVID-19: A multiwave SIR-  
673 based model for learning waves," *Production and Operations Management*, vol. 32, no. 5,  
674 pp. 1471–1489, 2023.
- 675 [32] K. Ghosh and A. K. Ghosh, "Study of covid-19 epidemiological evolution in india with a  
676 multi-wave sir model," *Nonlinear Dynamics*, vol. 109, no. 1, pp. 47–55, 2022.

- 677 [33] A. Leonov, O. Nagornov, and S. Tyuflin, "Modeling of mechanisms of wave formation for  
678 covid-19 epidemic," *Mathematics*, vol. 11, no. 1, p. 167, 2022.
- 679 [34] D. Caccavo, "Chinese and Italian COVID-19 outbreaks can be correctly described by a modified  
680 SIRD model," *MedRxiv*, pp. 2020–03, 2020.
- 681 [35] E. Loli Piccolomini and F. Zama, "Monitoring Italian COVID-19 spread by a forced SEIRD  
682 model," *PLOS ONE*, vol. 15, no. 8, pp. 1–17, 2020.
- 683 [36] S. Elsheikh, M. Abbas, M. Bakheet, and A. Degoot, "A mathematical model for the trans-  
684 mission of corona virus disease (COVID-19) in Sudan," *Preprint*, 2020.
- 685 [37] S. M. Manou-Abi and J. Balicchi, "Analysis of the COVID-19 epidemic in french overseas  
686 department Mayotte based on a modified deterministic and stochastic SEIR model," *MedRxiv*,  
687 pp. 2020–04, 2020.
- 688 [38] Ministry of Health, Kenya, "Ministry of Health, Kenya." <https://www.health.go.ke/>.  
689 [Accessed on diverse dates from March 2020 to January 2023].
- 690 [39] W. Info, "Coronavirus update. august 28, 2020." [https://www.worldometers.info/](https://www.worldometers.info/coronavirus)  
691 [coronavirus](https://www.worldometers.info/coronavirus), 2020. [Accessed on diverse dates from March 2020 to January 2023].
- 692 [40] C. Nasimiyu, D. Matoke-Muhia, G. K. Rono, E. Osoro, D. O. Ouso, J. M. Mwangi, N. Mwik-  
693 wabe, K. Thiong'o, J. Dawa, I. Ngere, *et al.*, "Imported SARS-COV-2 variants of concern  
694 drove spread of infections across Kenya during the second year of the pandemic," *Covid*,  
695 vol. 2, no. 5, pp. 586–598, 2022.

696

## Appendix A

697

# Wave computation and timeline of COVID-19 events

| Variables and Parameters                                                                                                                                                  | 2nd Wave  | 3rd Wave  | 4th wave 1st Spike | 4th wave 2nd Spike | 5th Wave  |           |
|---------------------------------------------------------------------------------------------------------------------------------------------------------------------------|-----------|-----------|--------------------|--------------------|-----------|-----------|
| <b>A. FRONT SECTION OF WAVES 2 - 5</b>                                                                                                                                    |           |           |                    |                    |           |           |
| <b>A1. Generation of new wave by relaxation</b>                                                                                                                           |           |           |                    |                    |           |           |
| Change point                                                                                                                                                              | $T_E$     | 03-Sep-20 | 28-Dec-20          | 02-May-21          | 27-Jun-21 | 21-Oct-21 |
| Transmission rate preceding relaxation at $T_E$ ; [= $\beta(T_E)$ ]                                                                                                       | $\beta_b$ | 0.13507   | 0.17018            | 0.16339            | 0.079341  | 0.13071   |
| Relaxation ratio for wave generation                                                                                                                                      | $c$       | -4        | -9                 | -7                 | -2.9      | -10       |
| Duration of optimal change of transmission rate                                                                                                                           | $m$       | 30        | 45                 | 30                 | 30        | 60        |
| Use values of $S, I, R, D$ and $\beta$ at $T_E$ to solve system till the time for enforcing delay-function as indicated below.                                            |           |           |                    |                    |           |           |
| <b>A2. Application of delay-function</b>                                                                                                                                  |           |           |                    |                    |           |           |
| Time in current wave at which delay-function is enforced                                                                                                                  | $T_G$     | 08-Oct-20 | 10-Feb-21          | 01-Jun-21          | 26-Jul-21 | 02-Dec-21 |
| Approximate infected ratio at $T_G$                                                                                                                                       | $I_G$     | 0.07394   | 0.04099            | 0.0724             | 0.143     | 0.0147    |
| Infection in previous wave that approximates $I_G$                                                                                                                        | $I_B$     | 0.07394   | 0.04099            | 0.0724             | 0.143     | 0.0147    |
| Time at which $I_B$ occurs.                                                                                                                                               | $T_B$     | 17-Jun-20 | 26-May-20          | 28-Feb-21          | 14-Mar-21 | 27-Apr-20 |
| Apply delay-function at $T_G$ to $S, I, R, D$ and $\beta$                                                                                                                 |           |           |                    |                    |           |           |
| <b>B. BACK SECTION OF WAVES 2 - 4</b>                                                                                                                                     |           |           |                    |                    |           |           |
| [Intervention: Relaxation/Mitigation]                                                                                                                                     |           |           |                    |                    |           |           |
| <b>A. CONTINUATION OF FRONT SECTION FOR WAVE 5</b>                                                                                                                        |           |           |                    |                    |           |           |
| <b>A3. Intervention (Relaxation) for Wave 5</b>                                                                                                                           |           |           |                    |                    |           |           |
| From $T_G$ solve the system for $L$ days then apply relaxation                                                                                                            |           |           |                    |                    |           |           |
| Number of days for solution after $T_G$                                                                                                                                   | $L$       | 0         | 11                 | 0                  | 0         | 0         |
| Time at intervention (= $T_{RX}$ for $c < 0$ or $T_{MT}$ for $0 < c < 1$ )                                                                                                | $T_{VN}$  | 08-Oct-20 | 21-Feb-21          | 01-Jun-21          | 26-Jul-21 | 02-Dec-21 |
| Transmission rate preceding intervention at $T_{VN}$ ; [= $\beta(T_{VN})$ ]                                                                                               | $\beta_b$ | 0.67533   | 0.10892            | 1.3071             | 0.29571   | 0.67286   |
| Apply Relaxation/Mitigation from non-intervention curve                                                                                                                   | $c$       | -0.26     | -0.5               | 0.5                | 0.2       | -4        |
| Duration of optimal change of transmission rate                                                                                                                           | $m$       | 15        | 10                 | 30                 | 15        | 15        |
| For waves 1 to 4, use the values at $T_{VN}$ to solve the system for $t > T_{VN}$ and obtain the rest of the wave. For 5th wave the process continues as indicated below. |           |           |                    |                    |           |           |
| <b>A4. Application of Second delay-function for Wave 5</b>                                                                                                                |           |           |                    |                    |           |           |
| $L$ days from relaxation, apply another delay-function                                                                                                                    |           |           |                    |                    |           |           |
| Number of days to follow previous relaxation                                                                                                                              | $L$       | —         | —                  | —                  | —         | 12        |
| Time at which the 2nd delay-function is enforced                                                                                                                          | $T_{G2}$  | —         | —                  | —                  | —         | 14-Dec-21 |
| Approximate infected fraction at $T_{G2}$                                                                                                                                 | $I_{G2}$  | —         | —                  | —                  | —         | 0.0988    |
| Infection in previous wave that approximates $I_{G2}$                                                                                                                     | $I_{B2}$  | —         | —                  | —                  | —         | 0.0985    |
| Time in previous wave where $I_{B2}$ occurs.                                                                                                                              | $T_{B2}$  | —         | —                  | —                  | —         | 16-Jul-21 |
| Apply delay-function at $T_{B2}$ ; Follow by relaxation at $T_{G2}$ .                                                                                                     |           |           |                    |                    |           |           |
| <b>C. BACK SECTION OF WAVE 5</b>                                                                                                                                          |           |           |                    |                    |           |           |
| [Intervention: Relaxation]                                                                                                                                                |           |           |                    |                    |           |           |
| Time for 2nd relaxation (= $T_{G2}$ )                                                                                                                                     | $T_{RX}$  | —         | —                  | —                  | —         | 14-Dec-21 |
| Transmission rate preceding 2nd relaxation; [= $\beta(T_{RX})$ ]                                                                                                          | $\beta_b$ | —         | —                  | —                  | —         | 0.39473   |
| Relaxation ratio                                                                                                                                                          | $c$       | —         | —                  | —                  | —         | -3.5      |
| Duration of optimal change of transmission rate                                                                                                                           | $m$       | —         | —                  | —                  | —         | 5         |
| Solve the system for $t > T_{RX}$ and obtain the rest of the wave.                                                                                                        |           |           |                    |                    |           |           |

Table A1: Computing the 2nd to 5th COVID-19 Waves in Kenya

| Variables and Parameters                                   | 6th Wave | 7th Wave |
|------------------------------------------------------------|----------|----------|
| <b>A. FRONT SECTION OF COMPUTED WAVE</b>                   |          |          |
| <b>A1. Generation of new wave by exponential infection</b> |          |          |

|                                                                                                                                                                      |                   |           |           |
|----------------------------------------------------------------------------------------------------------------------------------------------------------------------|-------------------|-----------|-----------|
| Change point                                                                                                                                                         | $T_E$             | 13–Mar–22 | 22–Aug–22 |
| Infected fraction at Change Point                                                                                                                                    | $I_E$             | 0.00255   | 0.00899   |
| Constant Susceptible fraction for exponential infection                                                                                                              | $S$               | 0.00036   | 0.63      |
| Transmission rate for exponential infection                                                                                                                          | $\beta_{XP}$      | 238       | 0.11      |
| Use values of $S, I, R, D$ at $T_E$ as initial values and solve system till the time for enforcing delay-function as below.                                          |                   |           |           |
| <b>A2. Application of delay-function</b>                                                                                                                             |                   |           |           |
| Time in current wave at which delay-function is enforced                                                                                                             | $T_G$             | 14–May–22 | 10–Oct–22 |
| Approximate infected fraction at $T_G$                                                                                                                               | $I_G$             | 0.00817   | 0.0101    |
| Infection in previous wave that approximates $I_G$                                                                                                                   | $I_B$             | 0.00827   | 0.0105    |
| Time at which $I_B$ occurs                                                                                                                                           | $T_B$             | 16–Apr–20 | 17-May-22 |
| Apply delay-function: Let $V(I_G) = V(I_B)$ , where $V$ is $S, I, R, D$ and $\beta$                                                                                  |                   |           |           |
| <b>B. BACK SECTION OF COMPUTED WAVES</b>                                                                                                                             |                   |           |           |
| <b>B1. Relaxation</b>                                                                                                                                                |                   |           |           |
| Apply relaxation at the point of delay-function                                                                                                                      |                   |           |           |
| Time of at which relaxation is enforced; [= $T_G$ ]                                                                                                                  | $T_{VN} = T_{RX}$ | 14–May–22 | 10–Oct–22 |
| Transmission rate preceding relaxation at $T_{RX}$ ; [= $\beta(T_{RX})$ ]                                                                                            | $\beta_b$         | 0.84538   | 0.029875  |
| Relaxation ratio                                                                                                                                                     | $c$               | –0.15     | –0.2      |
| Duration of optimal change of transmission rate                                                                                                                      | $m$               | 15        | 15        |
| <b>B2. Mitigation</b>                                                                                                                                                |                   |           |           |
| After following the relaxation curve, determine when to apply mitigation                                                                                             |                   |           |           |
| Time at which mitigation is applied                                                                                                                                  | $T_{VN} = T_{MT}$ | 17–Jun–22 | 05–Nov–22 |
| Transmission rate preceding relaxation at $T_{MG}$ ; [= $\beta(T_{MT})$ ]                                                                                            | $\beta_b$         | 0.169597  | 0.1781    |
| Mitigation ratio                                                                                                                                                     | $c$               | 0.82      | 0.68      |
| Duration of optimal change of transmission rate                                                                                                                      | $m$               | 15        | 10        |
| Use the values of $S, I, R, D$ and $\beta$ at $T_{MT}$ and the indicated mitigation parameters to solve the system for $t > T_{MG}$ and obtain the rest of the wave. |                   |           |           |

Table A2: **Computing the 6th and 7th COVID-19 Waves in Kenya**



|                  |                                                                                                                                                                                                                                               |
|------------------|-----------------------------------------------------------------------------------------------------------------------------------------------------------------------------------------------------------------------------------------------|
| <b>WAVE: 1st</b> | <b>DATES: MAR-2020 to SEP-2020   CHANGE POINT: 13-Mar-20</b>                                                                                                                                                                                  |
| MITIGATION:      | Closure of learning institutions; Restrictions on movement, restaurants, public transport, political, religious and social gatherings; Nation-wide curfew; Lockdown in some cities; Public hygiene & social distancing; Air travel suspended. |
| RELAXATION:      | 1st COVID-19 wave; Dominant SARS-CoV-2 variant - B.1.<br>Lockdown & restriction on movement lifted; Air travel resumed; Other controls relaxed.                                                                                               |
| <b>WAVE: 2nd</b> | <b>DATES: SEP-2020 to NOV-2020   CHANGE POINT: 03-Sep-20</b>                                                                                                                                                                                  |
| MITIGATION:      | Restrictions imposed again on restaurants, clubs, social and religious gatherings.                                                                                                                                                            |
| RELAXATION:      | 2nd COVID-19 wave; Dominant SARS-CoV-2 variant – Beta;<br>Restrictions eased on curfew, restaurants, social & religious gatherings; Schools partially open.                                                                                   |
| <b>WAVE: 3rd</b> | <b>DATES: DEC-2020 to APR-2021   CHANGE POINT: 28-Dec-20</b>                                                                                                                                                                                  |
| MITIGATION:      | Restrictions on restaurants, social & religious gatherings, public transport;<br>Lockdown of 5 counties (Nairobi and its environs); Vaccination starts – target of 27.25 million.                                                             |
| RELAXATION:      | 3rd COVID-19 wave; Dominant SARS-CoV-2 variant - Alpha;<br>Opening of learning institutions; Relaxation in public transport protocols.                                                                                                        |
| <b>WAVE: 4th</b> | <b>DATES: MAY-2021 to OCT-2021   CHANGE POINT: 02-May-21</b>                                                                                                                                                                                  |
| MITIGATION:      | Country-wide curfew; Restrictions on social gatherings; Vaccination (19.5% of target)                                                                                                                                                         |
| RELAXATION:      | 4th COVID-19 wave; Dominant SARS-CoV-2 variant - Delta;<br>Lockdown lifted of 5 counties (Nairobi and its environs).                                                                                                                          |
| <b>WAVE: 5th</b> | <b>DATES: OCT-2021 to FEB-2022   CHANGE POINT: 21-Oct-21</b>                                                                                                                                                                                  |
| MITIGATION:      | Enhanced vaccination campaign (45.7% of target).                                                                                                                                                                                              |
| RELAXATION:      | 5th COVID-19 wave; Dominant SARS-CoV-2 variant - Omicron;<br>Country-wide curfew lifted; Holiday travels; Learning institutions open.                                                                                                         |
| <b>WAVE: 6th</b> | <b>DATES: MAR-2022 to AUG-2022   CHANGE POINT: 13-Mar-22</b>                                                                                                                                                                                  |
| MITIGATION:      | Enhanced vaccination campaign (64.8% of target)                                                                                                                                                                                               |
| RELAXATION:      | 6th COVID-19 wave; Dominant SARS-CoV-2 variant – Omicron, sub-variants BA.4 & BA.5;<br>Election campaigns; Safari rally.                                                                                                                      |
| <b>WAVE: 7th</b> | <b>DATES: AUG-2022 to JAN-2023   CHANGE POINT: 22-Aug-22</b>                                                                                                                                                                                  |
| MITIGATION:      | Enhanced vaccination campaign (84.7% of target).                                                                                                                                                                                              |
| RELAXATION:      | 7th COVID-19 wave; Dominant SARS-CoV-2 variant - Omicron BQ1 and BQ1.1 ;<br>Election campaigns; Holiday travels; Learning institutions open.                                                                                                  |

**Table A3: Timeline of COVID-19 events in Kenya**
